# Supplementary material for: Epstein-Barr Virus Epitope–Major Histocompatibility Complex Interaction Combined with Convergent Recombination Drives Selection of Diverse T Cell Receptor α and β Repertoires
Source: mBio. 2020 Mar 17;11(2):e00250-20. doi: 10.1128/mBio.00250-20 (PMC7078470; doi:10.1128/mBio.00250-20)
Supplement: FIG S3 [file mBio.00250-20-sf003.pdf]

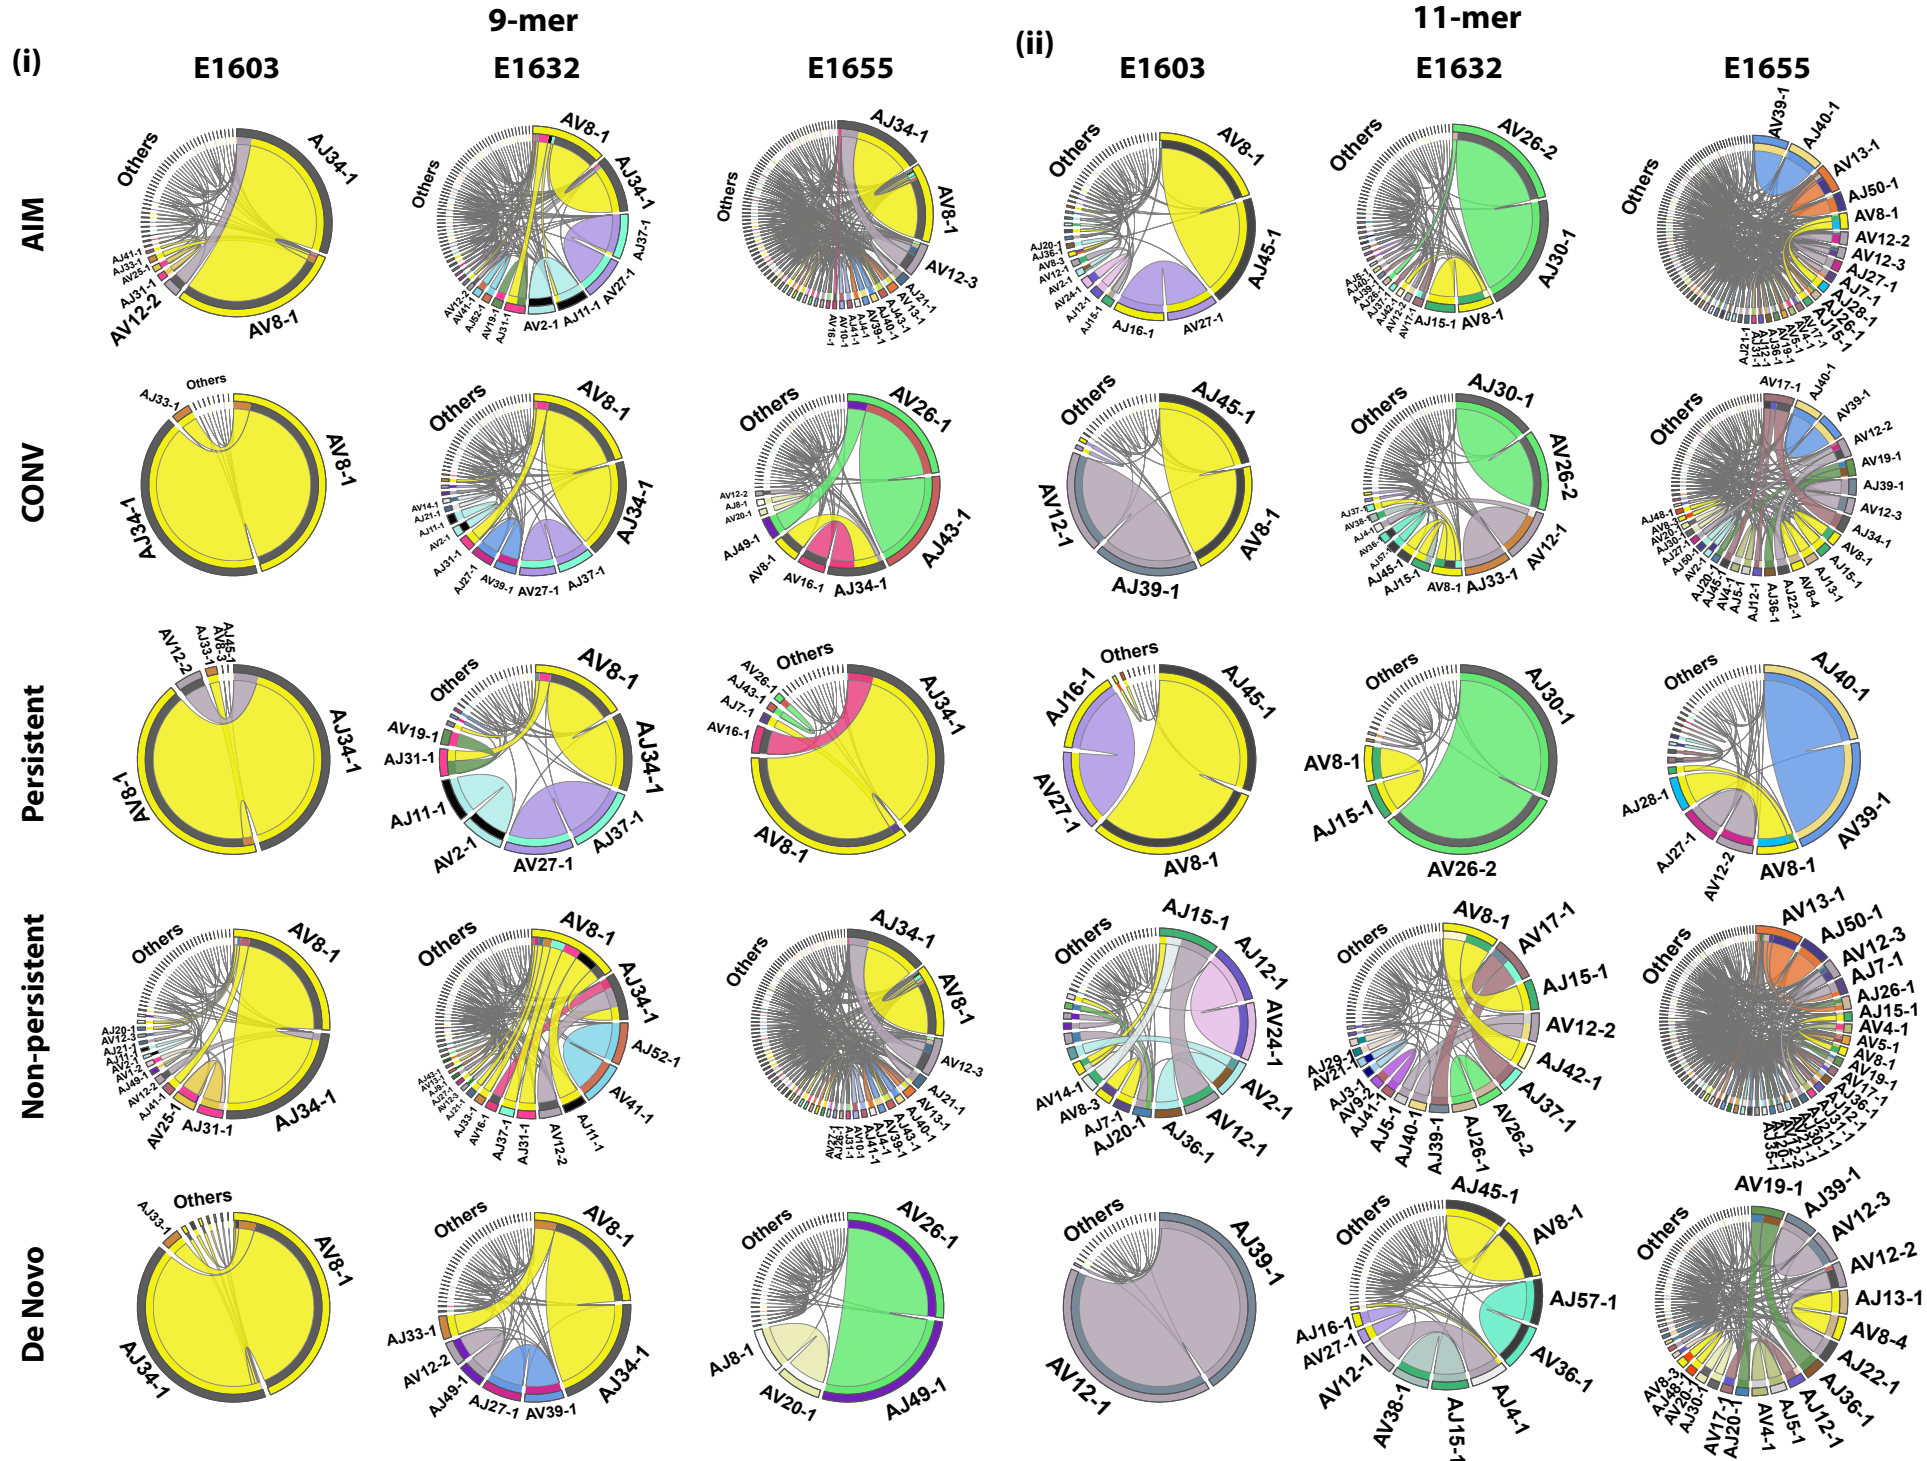

**Figure S3: Unique patterns of V-J usage for persistent, non-persistent and de novo clonotypes 9-mer (i) and 11-mer (ii) CDR3a of the YVL-BR-specific CD8 T cell responses as obtained by deep sequencing. The frequencies of V-J combinations in three AIM donors for YVL-BR-specific TCRA repertoires are displayed in circular chord diagrams, with frequency of each V or J cassette represented by its arc length and that of the V-J cassette combination by the width of the arc. For comparison the total acute and CONV circular chord diagrams are also shown.**
