# Supplementary material for: Epstein-Barr Virus Epitope–Major Histocompatibility Complex Interaction Combined with Convergent Recombination Drives Selection of Diverse T Cell Receptor α and β Repertoires
Source: PubMed Central journal article supplement (PMC7078470; doi:10.1128/mbio.00250-20), 2020-03-17
Supplement: mBio.00250-20-sf005.pdf [file mBio.00250-20-sf005.pdf]

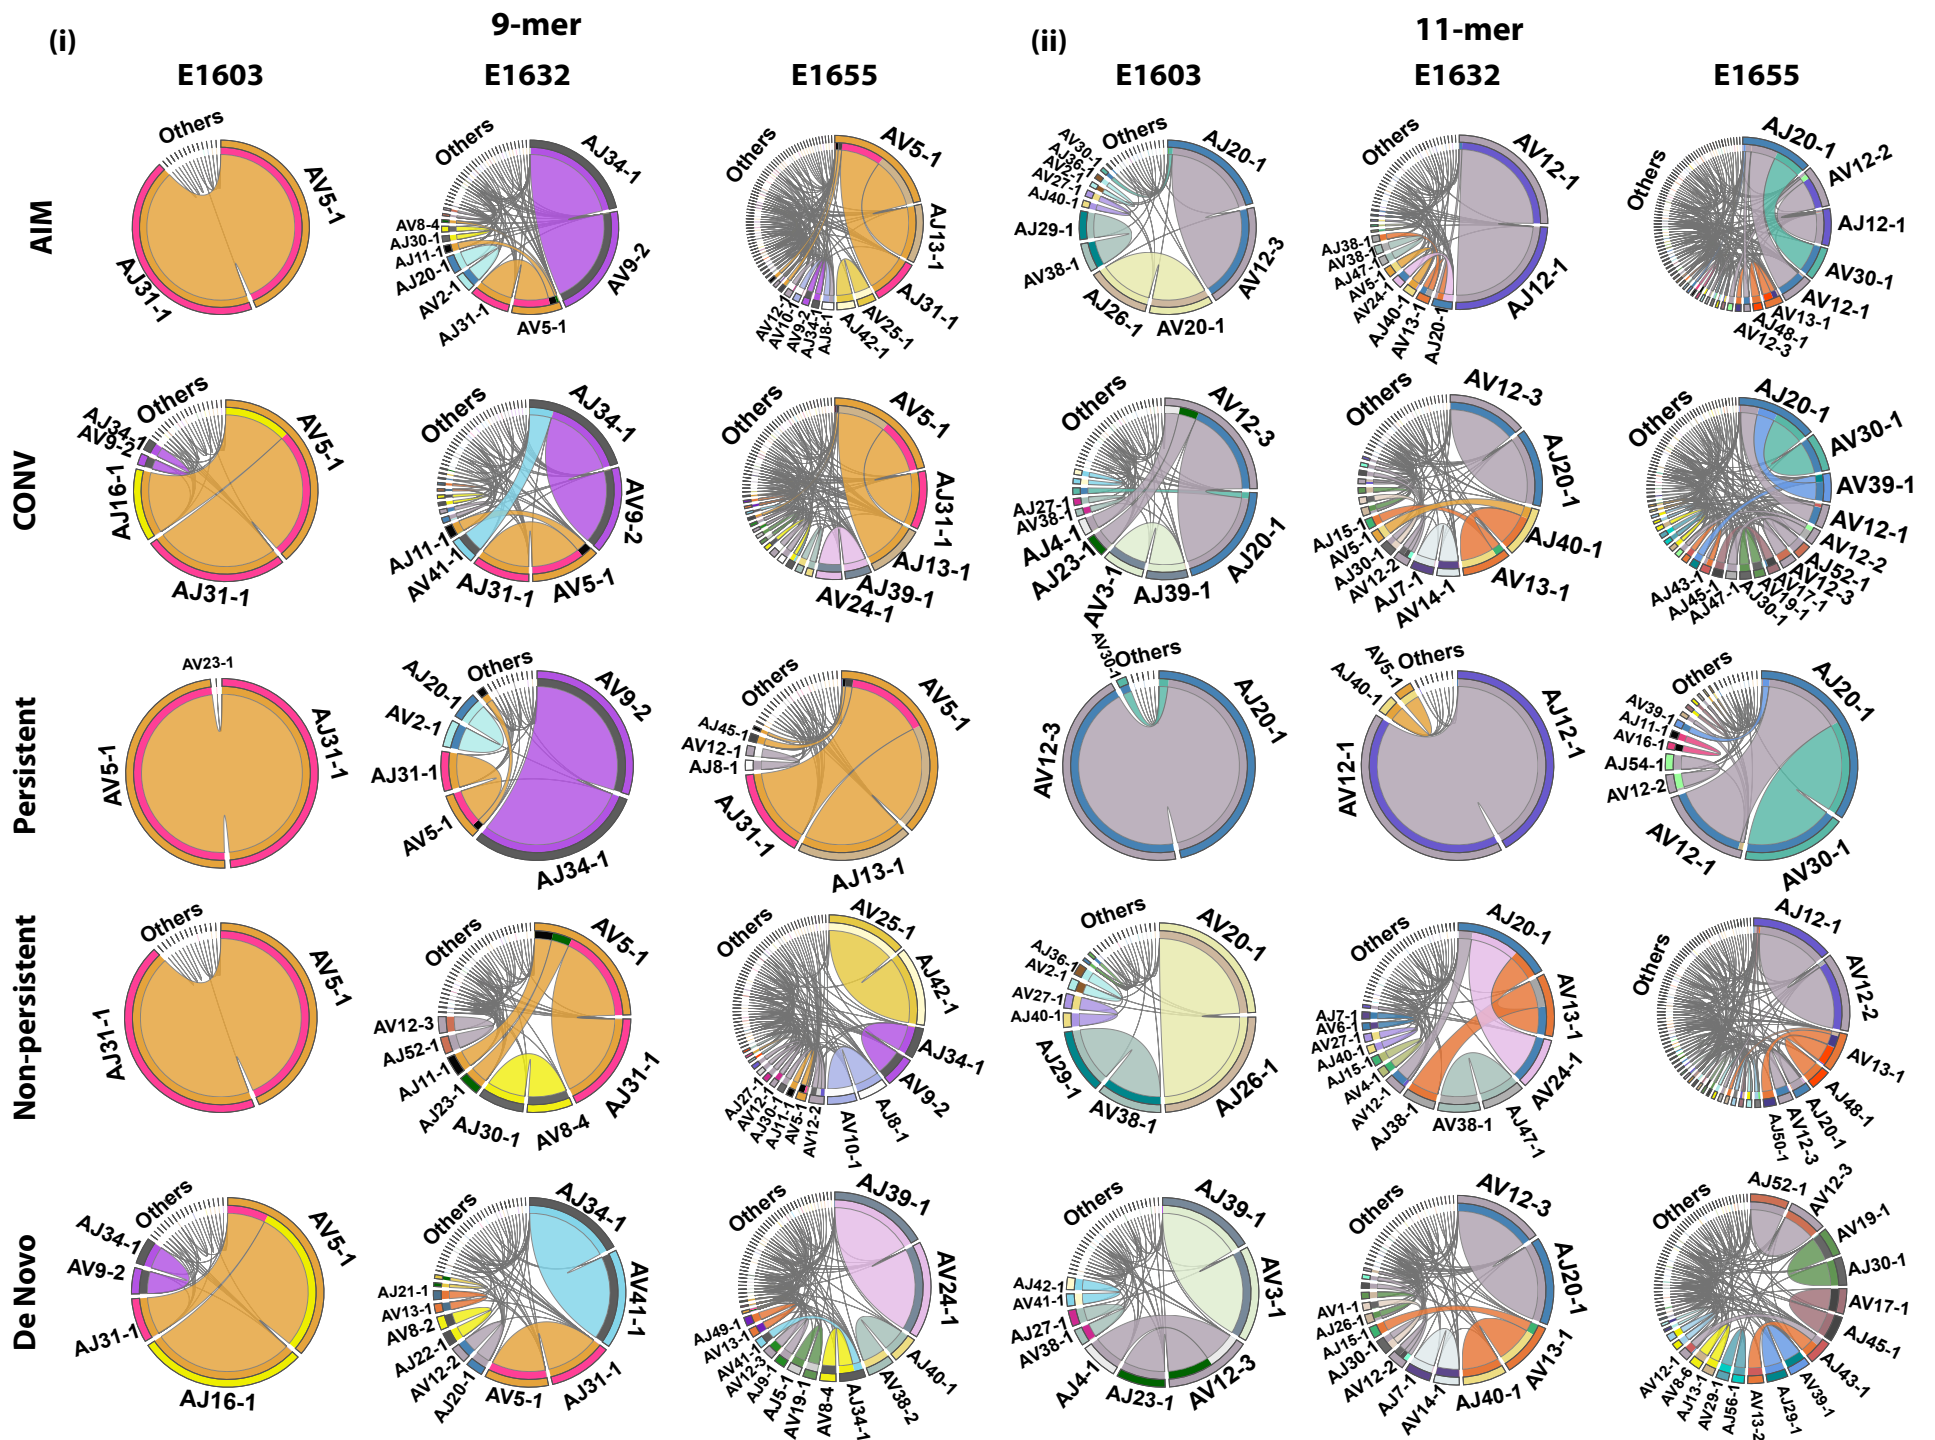

**Figure S5: Unique patterns of V-J usage for persistent, non-persistent and de novo clonotypes of 9-mer (i) and 11-mer (ii) CDR3a of the GLC-BM-specific CD8 T-cell responses. The frequencies of V-J combinations in three AIM donors for GLC-BM-specific TCRa repertoires are displayed in circos plots, with frequency of each V or J cassette represented by its arc length and that of the V-J cassette combination by the width of the arc. For comparison the total acute and convalescence circos plots are also shown.**
