# Supplementary material for: Epstein-Barr Virus Epitope–Major Histocompatibility Complex Interaction Combined with Convergent Recombination Drives Selection of Diverse T Cell Receptor α and β Repertoires
Source: PubMed Central journal article supplement (PMC7078470; doi:10.1128/mbio.00250-20), 2020-03-17
Supplement: mBio.00250-20-st001.pdf [file mBio.00250-20-st001.pdf]

**Supplementary Table 1:** Characteristics of AIM donors in study population

| Donor ID <sup>1</sup> | Gender | Time point | Elapsed time (months) <sup>2</sup> | EBV serology (VCA IgM) <sup>3</sup> | EBV viral load (log <sub>10</sub> copies/10 <sup>6</sup> B cells) | GLC <sup>4</sup> (%) | YVL <sup>4</sup> (%) |
|-----------------------|--------|------------|------------------------------------|-------------------------------------|-------------------------------------------------------------------|----------------------|----------------------|
| E1603                 | M      | AIM        | 6                                  | Pos                                 | 2.03                                                              | 0.6                  | 2.9                  |
|                       |        | CONV       |                                    |                                     | 1.92                                                              | 0.5                  | 0.7                  |
| E1632                 | F      | AIM        | 7                                  | Pos                                 | 4.36                                                              | 1.1                  | 2                    |
|                       |        | CONV       |                                    |                                     | No data <sup>5</sup>                                              | 0.2                  | 0.1                  |
| E1655                 | F      | AIM        | 5                                  | Pos                                 | 5.05                                                              | 1.6                  | 1.3                  |
|                       |        | CONV       |                                    |                                     | 3.30                                                              | 0.2                  | 0.1                  |

<sup>1</sup> TCR deep sequencing was performed on tetramer sorted CD8 T cells of all three donors diagnosed with AIM and were performed at the time presentation and 5-8 months later.

<sup>2</sup> Time elapsed between AIM and CONV.

<sup>3</sup> EBV serology was only performed at AIM.

<sup>4</sup> Frequency of HLA-A2 restricted YVL and GLC tetramer+ cells within CD3+ CD8+ T cells sorted from PBMCs isolated from each respective donor.

<sup>5</sup> B cells were not available from this donor to perform a viral load assay.

AIM: acute infectious mononucleosis; CONV: convalescence; M: male; F: Female; IgM: immunoglobulin M; VCA: viral capsid antigen; Pos: positive.
