# Supplementary material for: Epstein-Barr Virus Epitope–Major Histocompatibility Complex Interaction Combined with Convergent Recombination Drives Selection of Diverse T Cell Receptor α and β Repertoires
Source: PubMed Central journal article supplement (PMC7078470; doi:10.1128/mbio.00250-20), 2020-03-17
Supplement: mBio.00250-20-st004.pdf [file mBio.00250-20-st004.pdf]

**Supplemental Table S4:** YVL-BR specific and GLC-BM specific TRAV and TRBV dominant motifs in persistent, non-persistent and *de novo* clonotypes.

**A. YVL-BR specific TRAV (persistent clonotypes)**

| T cell receptor:                                            |  | Valpha                       |                 |                              |                 |                               |                 |                              |                 |                          |              |                           |              |
|-------------------------------------------------------------|--|------------------------------|-----------------|------------------------------|-----------------|-------------------------------|-----------------|------------------------------|-----------------|--------------------------|--------------|---------------------------|--------------|
| Motif sequence:                                             |  | Persistent "VKDTDK" (9-mer)  |                 |                              |                 |                               |                 |                              |                 |                          |              |                           |              |
| Sample name:                                                |  | E1603                        |                 |                              |                 | E1632                         |                 |                              |                 | E1655                    |              |                           |              |
| Phase of infection:                                         |  | AIM                          |                 | CONV                         |                 | AIM                           |                 | CONV                         |                 | AIM                      |              | CONV                      |              |
| Frequency of all copies (reads):                            |  | 32.37% (1,238,327/3,824,852) |                 | 42.29% (1,426,296/3,372,293) |                 | 12.66% (1,533,671/12,114,592) |                 | 15.87% (1,529,404/9,637,298) |                 | 81.82% (328,595/401,597) |              | 1.08% (81,139/ 7,472,186) |              |
| Frequency of all unique clonotypes:                         |  | 21.95% (36/164)              |                 | 21.95% (36/164)              |                 | 15.71% (71/452)               |                 | 15.71% (71/452)              |                 | 6.21% (25/402)           |              | 6.21% (25/402)            |              |
| Family usage (%):                                           |  | TRAV                         | TRAJ            | TRAV                         | TRAJ            | TRAV                          | TRAJ            | TRAV                         | TRAJ            | TRAV                     | TRAJ         | TRAV                      | TRAJ         |
| (% of usage of all other families detected for this sample) |  | AV8-1 (97.22%)               | AJ34-1 (94.44%) | AV8-1 (97.22%)               | AJ34-1 (94.44%) | AV8-1 (95.77%)                | AJ34-1 (88.73%) | AV8-1 (95.77%)               | AJ34-1 (88.73%) | AV8-1 (80%)              | AJ34-1 (76%) | AV8-1 (80%)               | AJ34-1 (76%) |
|                                                             |  | AV12-2 (2.78%)               | AJ45-1 ( 5.56%) | AV12-2 (2.78%)               | AJ45-1 ( 5.56%) | AV25 (1.4%)                   | AJ32-1 (2.81%)  | AV25 (1.4%)                  | AJ32-1 (2.81%)  | AV12-2 (16%)             | AJ50-1 (8%)  | AV12-2 (16%)              | AJ50-1 (8%)  |
|                                                             |  |                              |                 |                              |                 | AV14-1 (1.4%)                 | AJ30-1 (5.66%)  | AV14-1 (1.4%)                | AJ30-1 (5.66%)  | AV21-1 (4%)              | AJ32-1 (4%)  | AV21-1 (4%)               | AJ32-1 (4%)  |
|                                                             |  |                              |                 |                              |                 | AV3-1 (1.4%)                  | AJ59 (1.4%)     | AV3-1 (1.4%)                 | AJ59-1 (1.4%)   |                          | AJ26-1 (4%)  |                           | AJ26-1 (4%)  |
|                                                             |  |                              |                 |                              |                 |                               | AJ37 (1.4%)     |                              | AJ37-1 (1.4%)   |                          | AJ3-1 (8%)   |                           | AJ3-1 (8%)   |

**B. YVL-BR specific TRAV (non-persistent clonotypes)**

| T cell receptor:                                            |  | Valpha                          |                 |             |      |                           |                 |             |      |                            |                 |             |      |
|-------------------------------------------------------------|--|---------------------------------|-----------------|-------------|------|---------------------------|-----------------|-------------|------|----------------------------|-----------------|-------------|------|
| Motif sequence:                                             |  | Non-Persistent "VKDTDK" (9-mer) |                 |             |      |                           |                 |             |      |                            |                 |             |      |
| Sample name:                                                |  | E1603                           |                 |             |      | E1632                     |                 |             |      | E1655                      |                 |             |      |
| Phase of infection:                                         |  | AIM                             |                 | CONV        |      | AIM                       |                 | CONV        |      | AIM                        |                 | CONV        |      |
| Frequency of all copies (reads):                            |  | 8.02% (147,408/1,835,880)       |                 | not applied |      | 5.14% (185,175/3,602,802) |                 | not applied |      | 5.74% (792,204/13,797,945) |                 | not applied |      |
| Frequency of all unique clonotypes:                         |  | 8.09% (159/1965)                |                 | not applied |      | 4.71% (219/4,641)         |                 | not applied |      | 2.17% (196/9,021)          |                 | not applied |      |
| Family usage (%):                                           |  | TRAV                            | TRAJ            | TRAV        | TRAJ | TRAV                      | TRAJ            | TRAV        | TRAJ | TRAV                       | TRAJ            | TRAV        | TRAJ |
| (% of usage of all other families detected for this sample) |  | AV8-1 (82.39%)                  | AJ34-1 (94.96%) | not applied |      | AV8-1 (82.19%)            | AJ34-1 (90.84%) | not applied |      | AV8-1 (91.84%)             | AJ34-1 (92.86%) | not applied |      |
|                                                             |  | AV12-2 (13.20%)                 | AJ32 (1.88%)    |             |      | AV12 (11.87%)             | AJ46 (1.37%)    |             |      | AV12 (2.04%)               | AJ30 (1.02%)    |             |      |
|                                                             |  | AV3 (1.88%)                     | AJ30 (1.25%)    |             |      | AV21-1 (2.28%)            | AJ32 (1.37%)    |             |      | AV39-1 (1.02%)             | AJ20 (1.02%)    |             |      |
|                                                             |  | AV6 (1.25%)                     | AJ39 (0.62%)    |             |      | AV14-1 (1.37%)            | AJ31-1 (1.37%)  |             |      | AV21 (1.02%)               | AJ10 (1.02%)    |             |      |
|                                                             |  | AV25-1 (0.62%)                  | AJ20 (1.24%)    |             |      | AV3 (0.91%)               | AJ39-1 (0.91%)  |             |      | AV5 (1.02%)                | AJ59 (0.51%)    |             |      |
|                                                             |  | AV21-1 (0.62%)                  |                 |             |      | AV23-1 (0.45%)            | AJ37-1 (0.91%)  |             |      | AV3 (1.02%)                | AJ46 (0.51%)    |             |      |
|                                                             |  |                                 |                 |             |      | AV16-1 (0.45%)            | AJ20 (0.91%)    |             |      | AV29 (0.51%)               | AJ37 (0.51%)    |             |      |
|                                                             |  |                                 |                 |             |      | AV6 (0.45%)               | AJ3 (0.91%)     |             |      | AV23 (0.51%)               | AJ36 (0.51%)    |             |      |
|                                                             |  |                                 |                 |             |      |                           | AJ44 (0.45%)    |             |      | AV19 (0.51%)               | AJ32 (0.51%)    |             |      |
|                                                             |  |                                 |                 |             |      |                           | AJ27-1 (0.45%)  |             |      | AV13 (0.51%)               | AJ26-1 (0.51%)  |             |      |
|                                                             |  |                                 |                 |             |      |                           | AJ14-1 (0.45%)  |             |      |                            | AJ23 (1.2%)     |             |      |

**C. YVL-BR specific TRAV (*de novo* clonotypes)**

| T cell receptor:                                            |  | Valpha                   |      |                        |              |             |      |                         |                                 |             |      |                        |              |
|-------------------------------------------------------------|--|--------------------------|------|------------------------|--------------|-------------|------|-------------------------|---------------------------------|-------------|------|------------------------|--------------|
| Motif sequence:                                             |  | De novo "VKNTDK" (9-mer) |      |                        |              |             |      |                         |                                 |             |      |                        |              |
| Sample name:                                                |  | E1603                    |      |                        |              | E1632       |      |                         |                                 | E1655       |      |                        |              |
| Phase of infection:                                         |  | AIM                      |      | CONV                   |              | AIM         |      | CONV                    |                                 | AIM         |      | CONV                   |              |
| Frequency of all copies (reads):                            |  | not applied              |      | 0.0035% (65/1,835,880) |              | not applied |      | 0.00094% (34/3,602,802) |                                 | not applied |      | 0.00025% (34/13797945) |              |
| Frequency of all unique clonotypes:                         |  | not applied              |      | 0.4% (8/1,965)         |              | not applied |      | 0.24% (11/4,641)        |                                 | na          |      | 0.055% (5/9,021)       |              |
| Family usage (%):                                           |  | TRAV                     | TRAJ | TRAV                   | TRAJ         | TRAV        | TRAJ | TRAV                    | TRAJ                            | TRAV        | TRAJ | TRAV                   | TRAJ         |
| (% of usage of all other families detected for this sample) |  | not applied              |      | AV8-1 (100%)           | AJ34-1(100%) | not applied |      | AV8-1 (100%)            | AJ34-1 (90.9%)<br>AJ37-1 (9.1%) | not applied |      | AV8-1 (100%)           | AJ34-1(100%) |





### I. GLC-BM specific TRBV (persistent clonotypes)

| T cell receptor:                                            | Vbeta                        |           |           |           |                               |                     |                           |                     |                              |                     |                                 |                     |
|-------------------------------------------------------------|------------------------------|-----------|-----------|-----------|-------------------------------|---------------------|---------------------------|---------------------|------------------------------|---------------------|---------------------------------|---------------------|
| Motif sequence:                                             | Persistent "SQSPGG" (11-mer) |           |           |           |                               |                     |                           |                     |                              |                     |                                 |                     |
| Sample name:                                                | E1603                        |           |           |           | E1632                         |                     |                           |                     | E1655                        |                     |                                 |                     |
| Phase of infection:                                         | AIM                          |           | CONV      |           | AIM                           |                     | CONV                      |                     | AIM                          |                     | CONV                            |                     |
| Frequency of all copies (reads):                            | not found                    |           | not found |           | 31.22% (5,349,199/17,132,769) |                     | 4.26% (214,440/5,029,504) |                     | 47.86% (4,665,421/9,746,758) |                     | 8254039 / 15050633 = 54.841806% |                     |
| Frequency of all unique clonotypes:                         | not found                    |           | not found |           | 5.35% (19/355)                |                     | 5.35% (19/355)            |                     | 22.95% (202/880)             |                     | 202 / 880 = 22.954545%          |                     |
| Family usage (%):                                           | TRBV                         | TRBJ      | TRBV      | TRBJ      | TRBV                          | TRBJ                | TRBV                      | TRBJ                | TRBV                         | TRBJ                | TRBV                            | TRBJ                |
| (% of usage of all other families detected for this sample) | not found                    | not found | not found | not found | <b>BV14-1 (47.36%)</b>        | <b>BJ2-4 (100%)</b> | <b>BV14-1 (47.36%)</b>    | <b>BJ2-4 (100%)</b> | <b>BV14-1 (57.92%)</b>       | <b>BJ2-5 (100%)</b> | <b>BV14-1 (57.92%)</b>          | <b>BJ2-5 (100%)</b> |
|                                                             |                              |           |           |           | BV5-1 (10.52%)                |                     | BV5-1 (10.52%)            |                     | BV7.2 (8.91%)                |                     | BV7.2 (8.91%)                   |                     |
|                                                             |                              |           |           |           | BV27 (5.26%)                  |                     | BV27 (5.26%)              |                     | BV9-1 (4.45%)                |                     | BV9-1 (4.45%)                   |                     |
|                                                             |                              |           |           |           | BV18 (5.26%)                  |                     | BV18-1 (5.26%)            |                     | BV6 (4.45%)                  |                     | BV6 (4.45%)                     |                     |
|                                                             |                              |           |           |           | BV12 (5.26%)                  |                     | BV12 (5.26%)              |                     | BV4-1 (3.46%)                |                     | BV4-1 (3.46%)                   |                     |
|                                                             |                              |           |           |           | BV11 (5.26%)                  |                     | BV11 (5.26%)              |                     | BV27 (2.47%)                 |                     | BV27 (2.47%)                    |                     |
|                                                             |                              |           |           |           | BV9-1 (5.26%)                 |                     | BV9-1 (5.26%)             |                     | BV25 (2.47%)                 |                     | BV25 (2.47%)                    |                     |
|                                                             |                              |           |           |           | BV7-2 (5.26%)                 |                     | BV7-2 (5.26%)             |                     | BV23 (2.47%)                 |                     | BV23 (2.47%)                    |                     |
|                                                             |                              |           |           |           | BV6 (5.26%)                   |                     | BV6 (5.26%)               |                     | BV21 (2.47%)                 |                     | BV21 (2.47%)                    |                     |
|                                                             |                              |           |           |           | BV3-1 (5.26%)                 |                     | BV3-1 (5.26%)             |                     | BV12 (2.47%)                 |                     | BV12un (2.47%)                  |                     |
|                                                             |                              |           |           |           |                               |                     |                           |                     | BV11 (2.47%)                 |                     | BV11 (2.47%)                    |                     |
|                                                             |                              |           |           |           |                               |                     |                           |                     | BV3 29.47%                   |                     | BV3 29.47%                      |                     |
|                                                             |                              |           |           |           |                               |                     |                           |                     | BV2 (1.48%)                  |                     | BV2 (1.48%)                     |                     |
|                                                             |                              |           |           |           |                               |                     |                           |                     | BV13 (0.99%)                 |                     | BV13 (0.99%)                    |                     |
|                                                             |                              |           |           |           |                               |                     |                           |                     | BV28 (0.49%)                 |                     | BV28 (0.49%)                    |                     |
|                                                             |                              |           |           |           |                               |                     |                           |                     | BV10 (0.49%)                 |                     | BV10 (0.49%)                    |                     |

### J. GLC-BM specific TRBV (non-persistent clonotypes)

| T cell receptor:                                            | Vbeta                          |                       |             |      |                             |                      |             |      |                            |                       |             |      |
|-------------------------------------------------------------|--------------------------------|-----------------------|-------------|------|-----------------------------|----------------------|-------------|------|----------------------------|-----------------------|-------------|------|
| Motif sequence:                                             | Non Persistent "SARD" (11-mer) |                       |             |      |                             |                      |             |      |                            |                       |             |      |
| Sample name:                                                | E1603                          |                       |             |      | E1632                       |                      |             |      | E1655                      |                       |             |      |
| Phase of infection:                                         | AIM                            |                       | CONV        |      | AIM                         |                      | CONV        |      | AIM                        |                       | CONV        |      |
| Frequency of all copies (reads):                            | 4.78% (488,798 / 10,224,655)   |                       | not applied |      | 3.03% (114,341 / 3,769,869) |                      | not applied |      | 0.95% (19,206 / 2,020,587) |                       | not applied |      |
| Frequency of all unique clonotypes:                         | 13.84% (371 / 2,681)           |                       | not applied |      | 3.66% (148 / 4,043)         |                      | not applied |      | 2.54% (140 / 5,508)        |                       | not applied |      |
| Family usage (%):                                           | TRBV                           | TRBJ                  | TRBV        | TRBJ | TRBV                        | TRBJ                 | TRBV        | TRBJ | TRBV                       | TRBJ                  | TRBV        | TRBJ |
| (% of usage of all other families detected for this sample) | <b>BV20 (99.46%)</b>           | <b>BJ1-2 (99.73%)</b> | not applied |      | <b>BV20 (98.65%)</b>        | <b>BJ01 (97.97%)</b> | not applied |      | <b>BV20 (99.28%)</b>       | <b>BJ1-3 (99.28%)</b> | not applied |      |
|                                                             | BV29-1 (0.54%)                 | BJ2 (0.27%)           |             |      | BV29-1 (1.35%)              | BJ2 (2.03%)          |             |      | BV29-1 (0.72%)             | BJ2 (0.71%)           |             |      |

### K. GLC-BM specific TRBV (de novo clonotypes)

| T cell receptor:                                            | Vbeta                   |      |                           |                       |             |      |                            |                     |             |      |                         |                     |
|-------------------------------------------------------------|-------------------------|------|---------------------------|-----------------------|-------------|------|----------------------------|---------------------|-------------|------|-------------------------|---------------------|
| Motif sequence:                                             | De Novo "SARD" (11-mer) |      |                           |                       |             |      |                            |                     |             |      |                         |                     |
| Sample name:                                                | E1603                   |      |                           |                       | E1632       |      |                            |                     | E1655       |      |                         |                     |
| Phase of infection:                                         | AIM                     |      | CONV                      |                       | AIM         |      | CONV                       |                     | AIM         |      | CONV                    |                     |
| Frequency of all copies (reads):                            | not applied             |      | 4.9% (517,874/10,580,372) |                       | not applied |      | 10.14% (948,733/9,348,647) |                     | not applied |      | 0.012% (666/ 5,575,518) |                     |
| Frequency of all unique clonotypes:                         | not applied             |      | 8.41% (213/2,532)         |                       | not applied |      | 2.3% (132/5,764)           |                     | not applied |      | 1.4% (73/5,207)         |                     |
| Family usage (%):                                           | TRAV                    | TRAJ | TRBV                      | TRBJ                  | TRAV        | TRAJ | TRBV                       | TRBJ                | TRAV        | TRAJ | TRBV                    | TRBJ                |
| (% of usage of all other families detected for this sample) | not applied             |      | <b>BV20-1 (98.59%)</b>    | <b>BJ1-3 (99.53%)</b> | not applied |      | <b>BV20-1 (98.48%)</b>     | <b>BJ1 (89.39%)</b> | not applied |      | <b>BV20-1 (100%)</b>    | <b>BJ1 (95.89%)</b> |
|                                                             |                         |      | BV29-1(1.41%)             | BJ2-3 (0.47%)         |             |      | BV29-1 (1.52%)             | BJ2-3 (10.6%)       |             |      |                         | BJ2-1 (4.11%)       |
